# Supplementary material for: 日本におけるイタリア観の形成 : 『米欧回覧実記』に見るイタリアのイメージを中心に (特集 国際シンポジウム イタリア観の一世紀 : 旅と知と美 : 2.イタリアをまなざす旅と美意識)
Source: Royal Society of Chemistry journal article supplement (doi:10.1039/d2cp05027g), 2008-11-01
Supplement: d2cp05027g1.pdf [file d2cp05027g1.pdf]

## Supporting Information

### Materials design of edge-modified polymeric carbon nitride nanoribbons for photocatalytic CO<sub>2</sub> reduction reaction

Shaohua Liu,<sup>a</sup> Yi Li,<sup>ab</sup> Yongfan Zhang,<sup>\*ab</sup> Wei Lin<sup>\*ab</sup>

<sup>a</sup> State Key Laboratory of Photocatalysis on Energy and Environment, College of Chemistry,  
Fuzhou University, Fuzhou 350108, P.R. China

<sup>b</sup> Fujian Provincial Key Laboratory of Theoretical and Computational Chemistry, Xiamen  
University, Xiamen, Fujian 361005, China

E-mail: zhangyf@fzu.edu.cn (Y. Zhang); wlin@fzu.edu.cn (W. Lin)

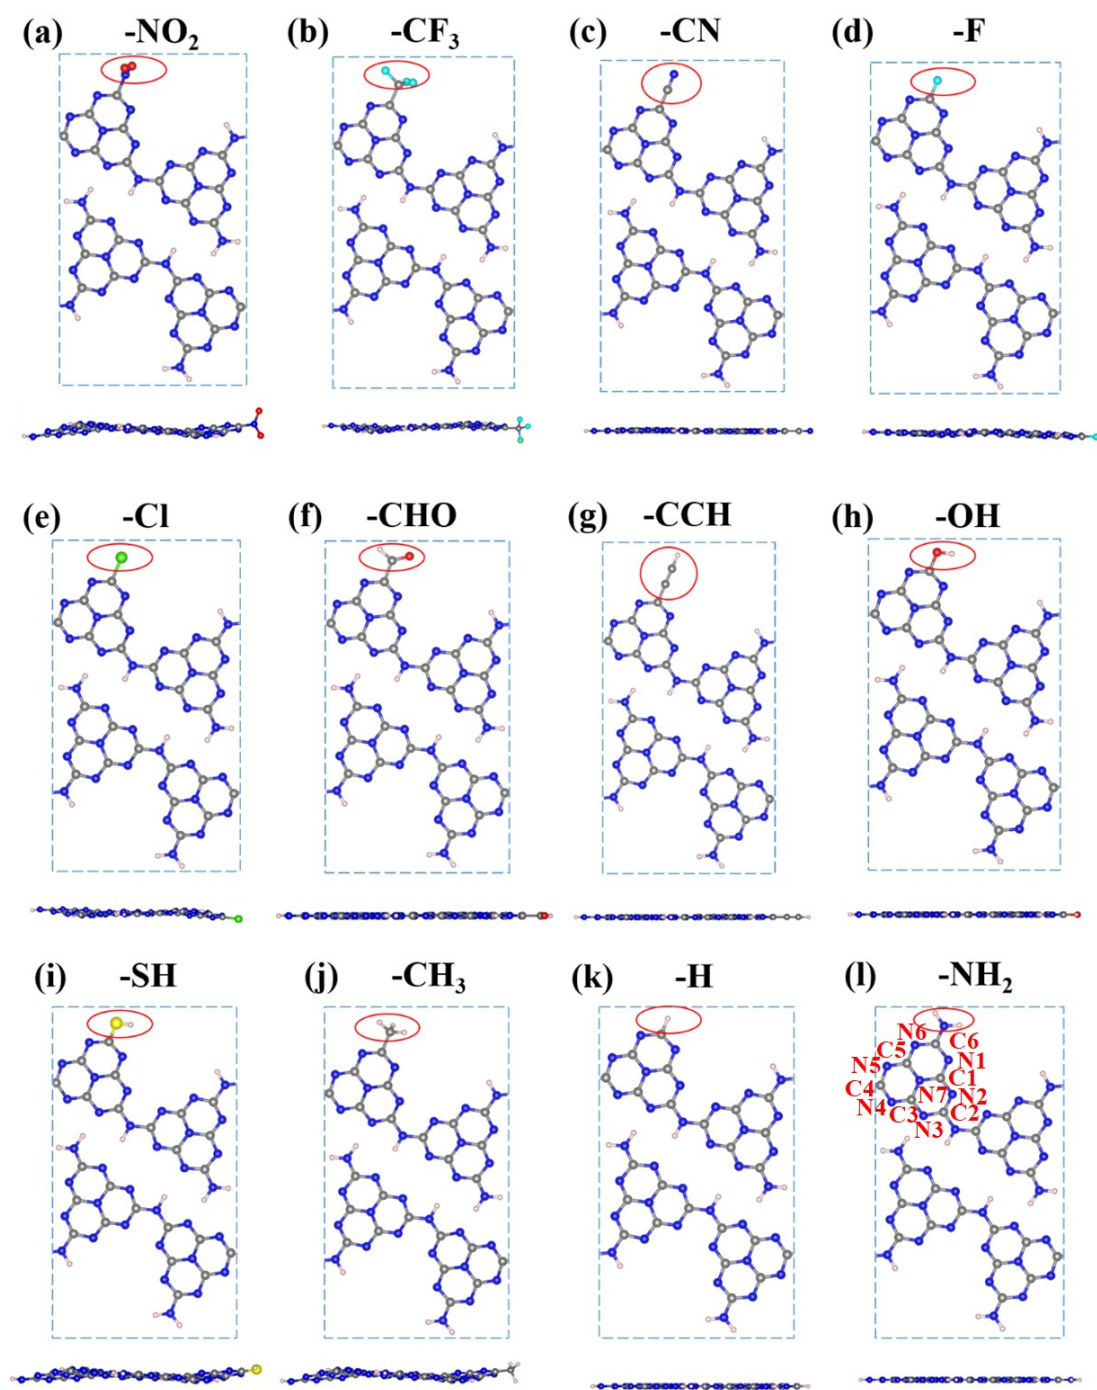

**Fig. S1** Top and side views of edge-modified melon-based CN nanoribbons (X-MNRs, X = (a) -NO<sub>2</sub>; (b) -CF<sub>3</sub>; (c) -CN; (d) -CHO; (e) -F; (f) -Cl; (g) -C≡CH; (h) -OH; (i) -SH; (j) -CH<sub>3</sub>; (k) -H; (l) -NH<sub>2</sub>). Grey, brown, pink, red, yellow, blue, and green represent C, N, H, O, S, F, and Cl atoms, respectively.

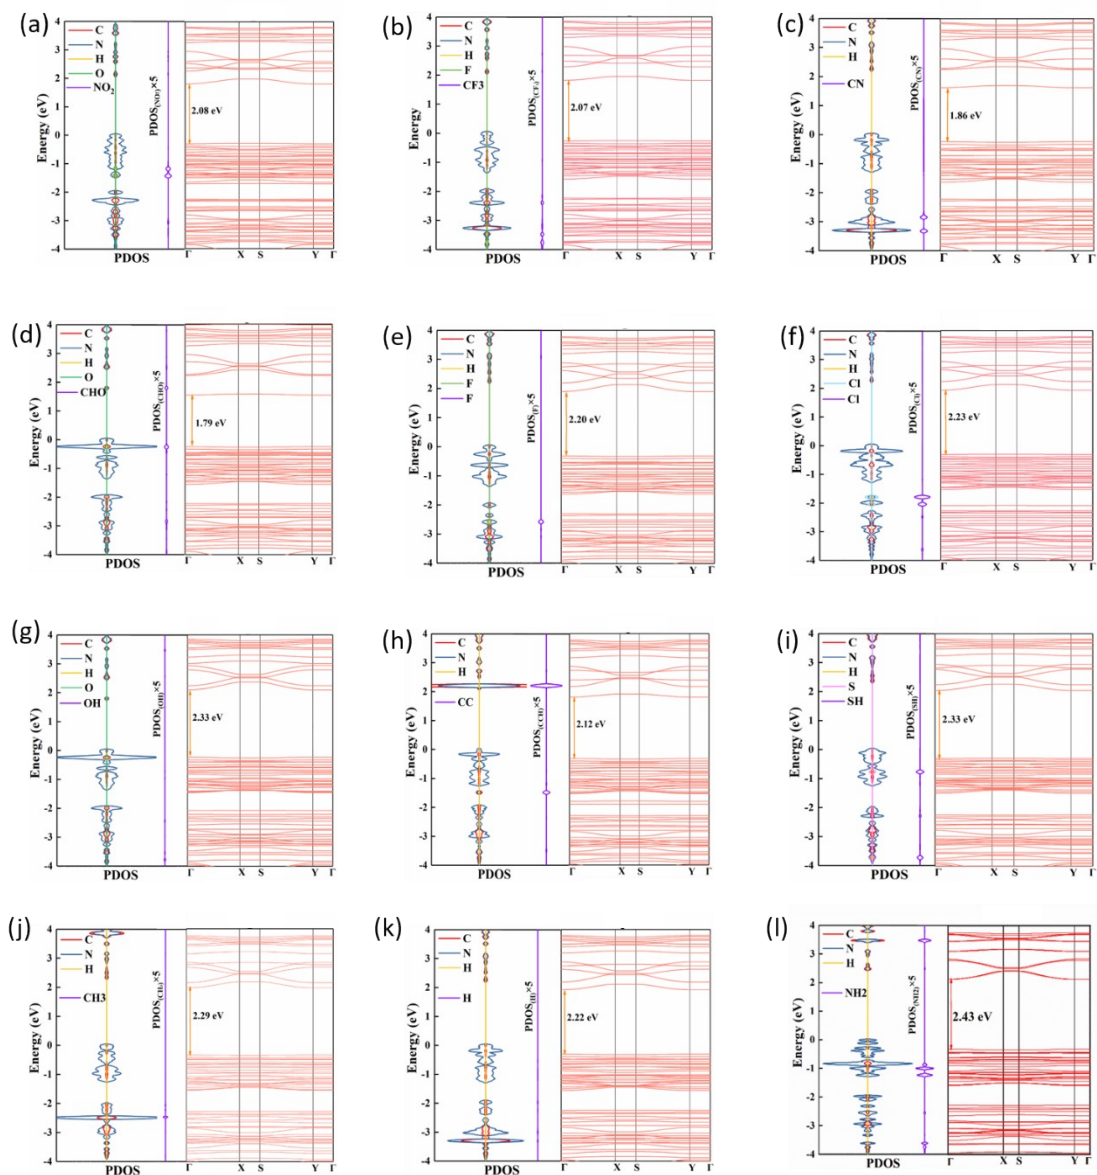

**Fig. S2** The projected Density of states (pDOS) and band structures of edge-modified melon-based CN Nanoribbons (X-MNRs, X = (a) -NO<sub>2</sub>; (b) -CF<sub>3</sub>; (c) -CN; (d) -CHO; (e) -F; (f) -Cl; (g) -OH; (h) -C≡CH; (i) -SH; (j) -CH<sub>3</sub>; (k) -H; (l) -NH<sub>2</sub>)

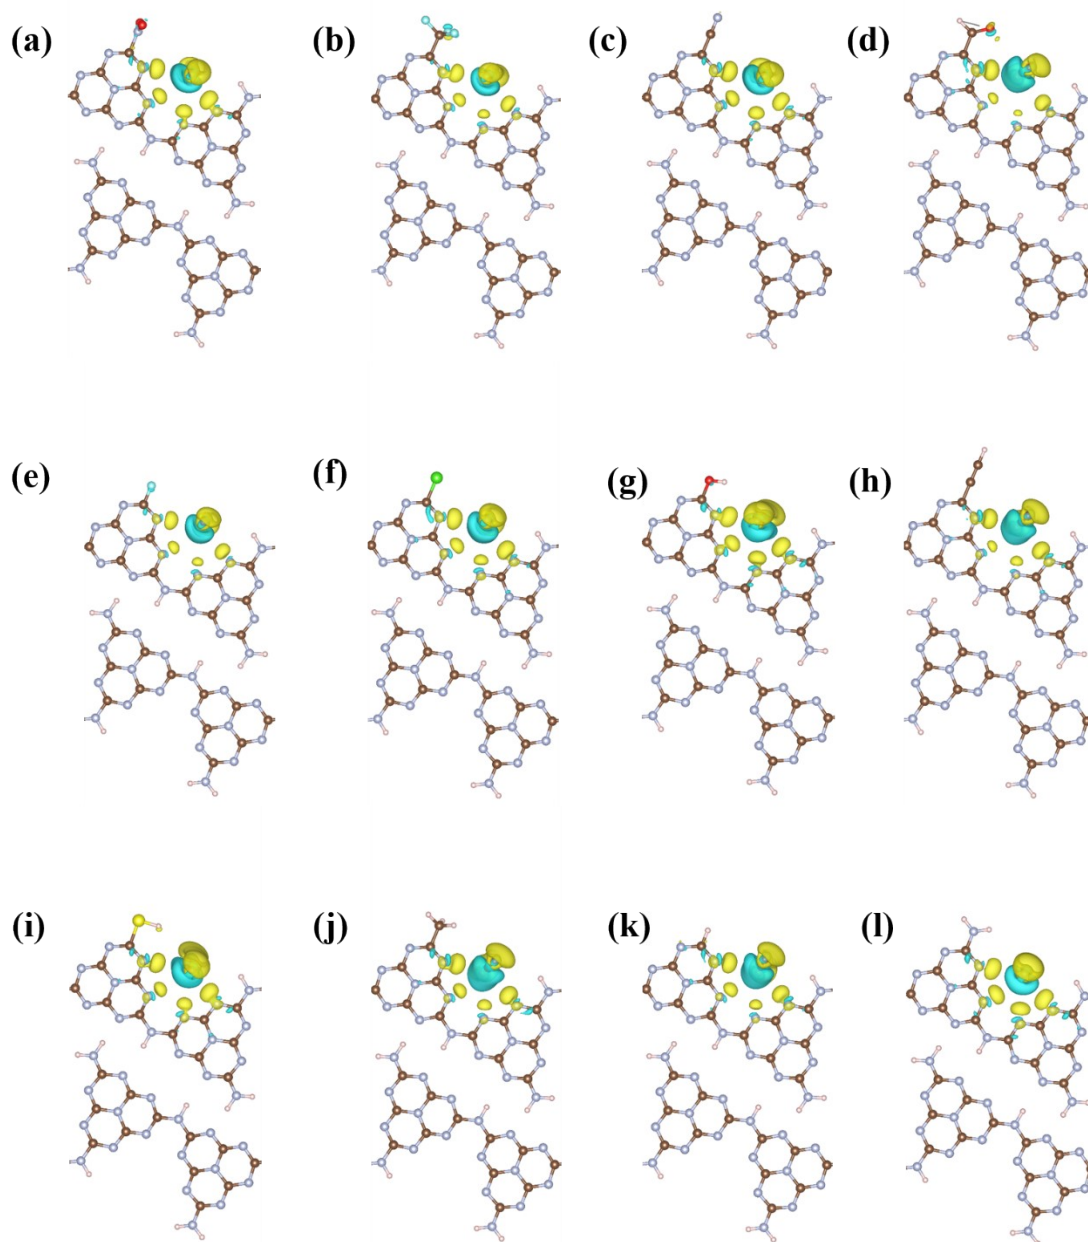

**Fig. S3** Charge density difference of CO<sub>2</sub> adsorption on edge-modified melon-based CN nanoribbons (X-MNRs, X = (a) -NO<sub>2</sub>; (b) -CF<sub>3</sub>; (c) -CN; (d) -CHO; (e) -F; (f) -Cl; (g) -OH; (h) -C≡CH; (i) -SH; (j) -CH<sub>3</sub>; (k) -H; (l) -NH<sub>2</sub>). The yellow and green areas represent the positive and negative values of electrons, respectively. Grey, brown, pink, red, yellow, blue, and green balls represent C, N, H, O, S, F, and Cl atoms, respectively.

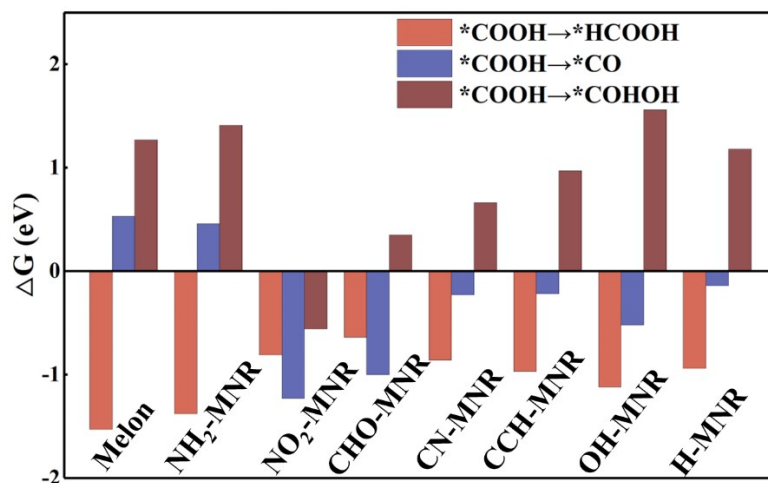

**Fig. S4** The \*COOH hydrogenation competitive elementary reaction of melon-based CN and edge-modified melon-based CN nanoribbons (X-MNRs, X = -NH<sub>2</sub>, -NO<sub>2</sub>, -CHO, -CN, -C≡CH, -OH, and -H).

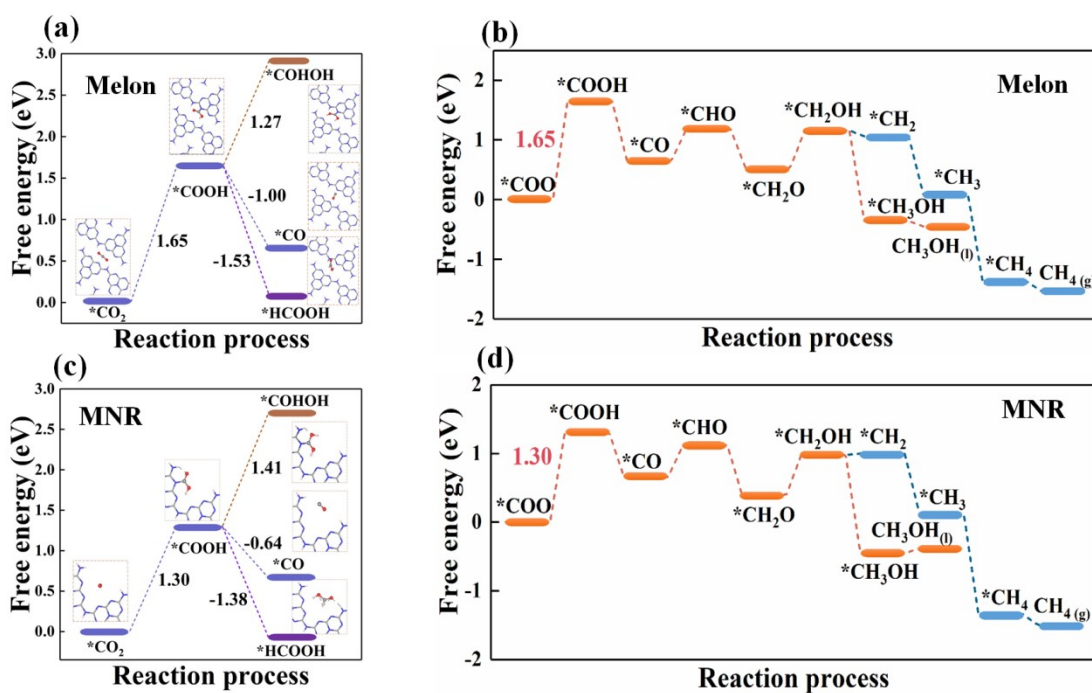

**Fig. S5** (a) Two-electron and (b) six/eight-electron reaction process of CO<sub>2</sub> reduction by melon; (c) two-electron and (d) six/eight-electron reaction process of CO<sub>2</sub> reduction by MNR.

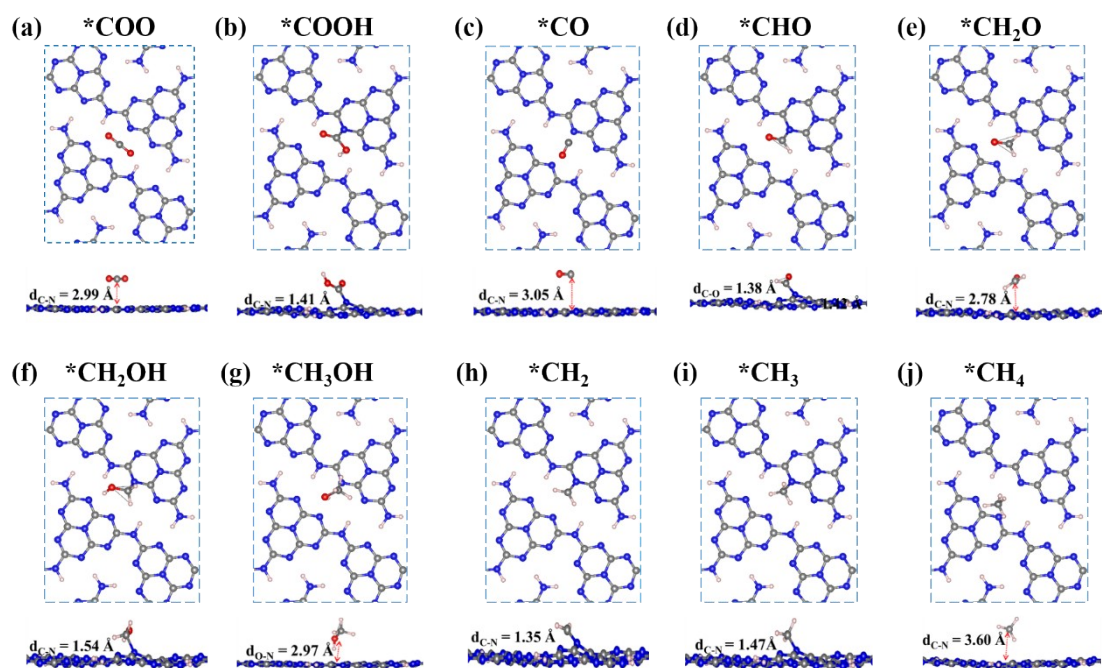

**Fig. S6** Top and side views of the structure of the CO<sub>2</sub> reduction reaction intermediate of melon, where grey, blue, pink, and red represent C, N, H, and O atoms.

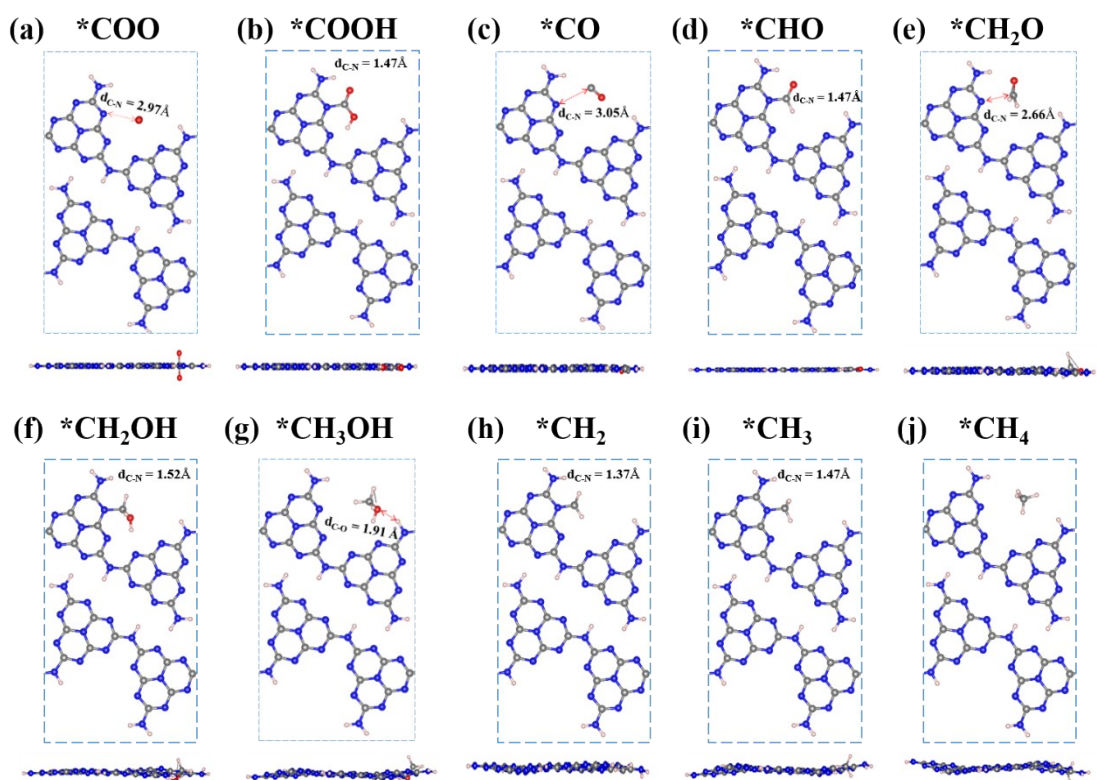

**Fig. S7** Top and side views of the structure of the CO<sub>2</sub> reduction reaction intermediate of edge-modified melon-based CN nanoribbons (NH<sub>2</sub>-MNR), where grey, blue, pink, and red represent C, N, H, and O atoms.

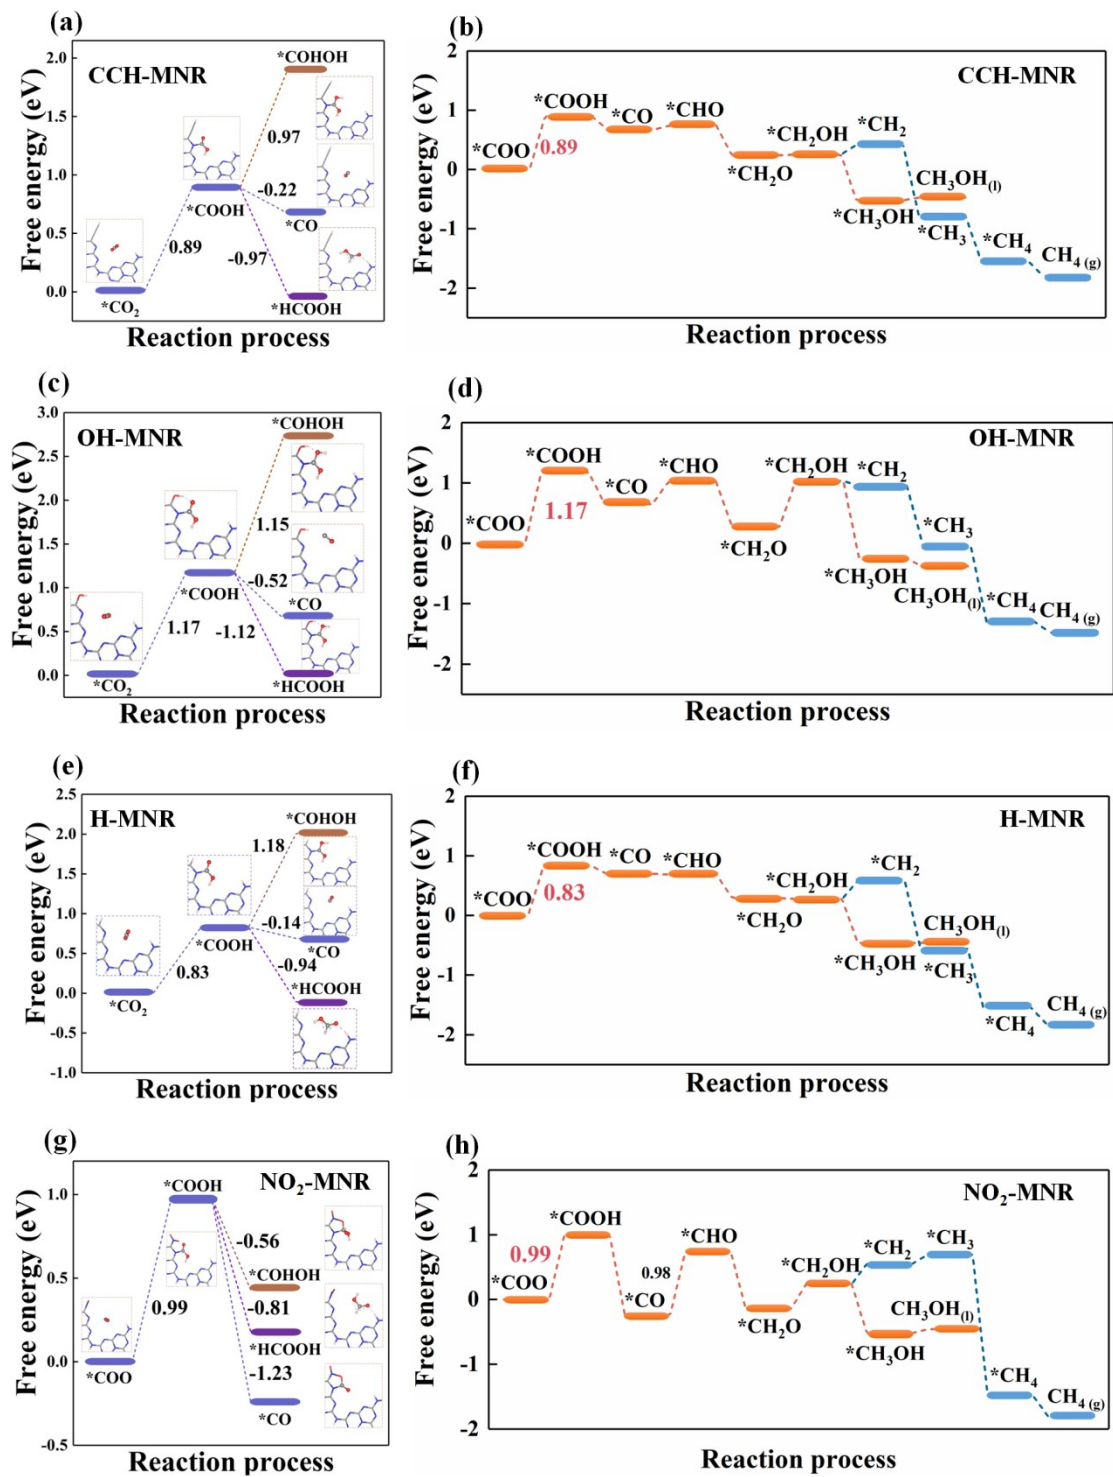

Fig. S8 Two-electron and six/eight-electron reaction process of  $\text{CO}_2$  reduction by (a and b) CCH-MNR; (c and d) OH-MNR; (e and f) H-MNR; and (g and h)  $\text{NO}_2$ -MNR.

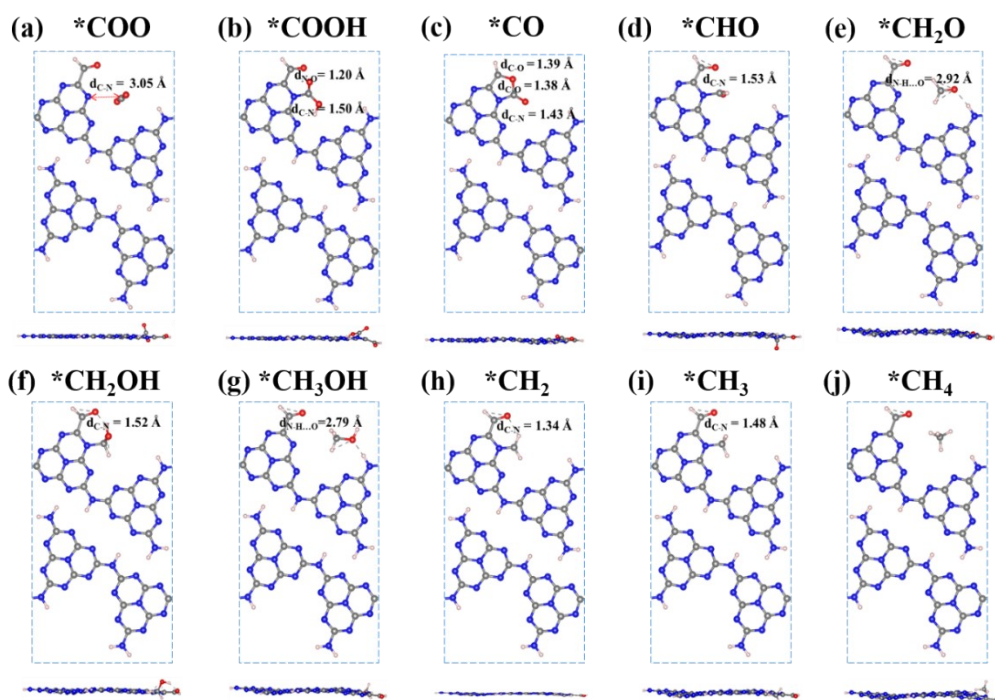

**Fig.S9** Top and side views of the structure of the CO<sub>2</sub> reduction reaction intermediate of edge-modified melon-based CN nanoribbons (CHO-MNR), where grey, blue, pink, and red represent C, N, H, and O atoms.

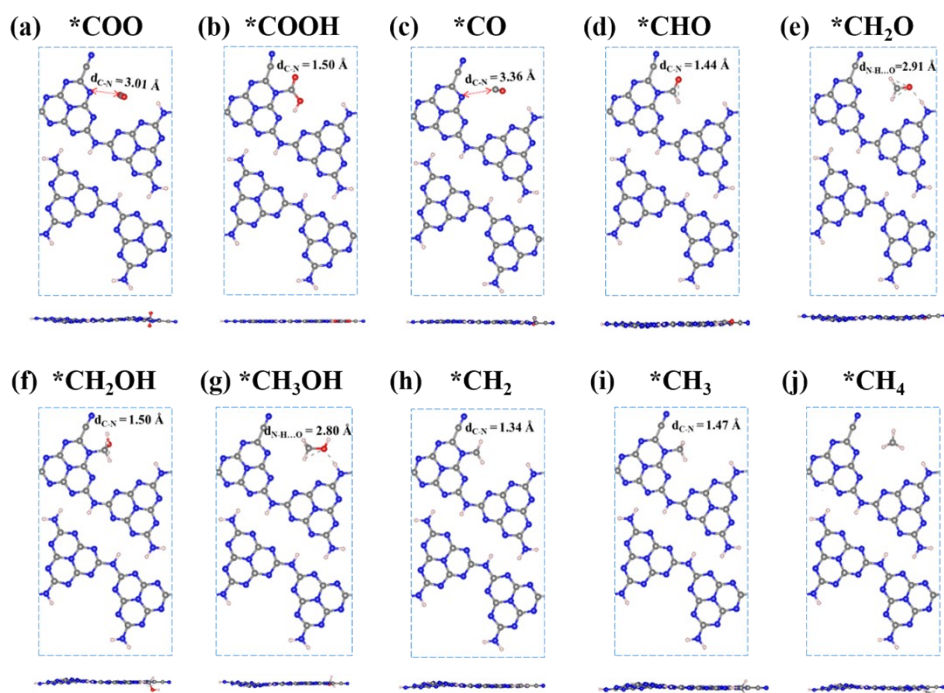

**Fig. S10** Top and side views of the structure of the CO<sub>2</sub> reduction reaction intermediate of edge-modified melon-based CN nanoribbons (CN-MNR), where grey, blue, pink, and red represent C, N, H, and O atoms.



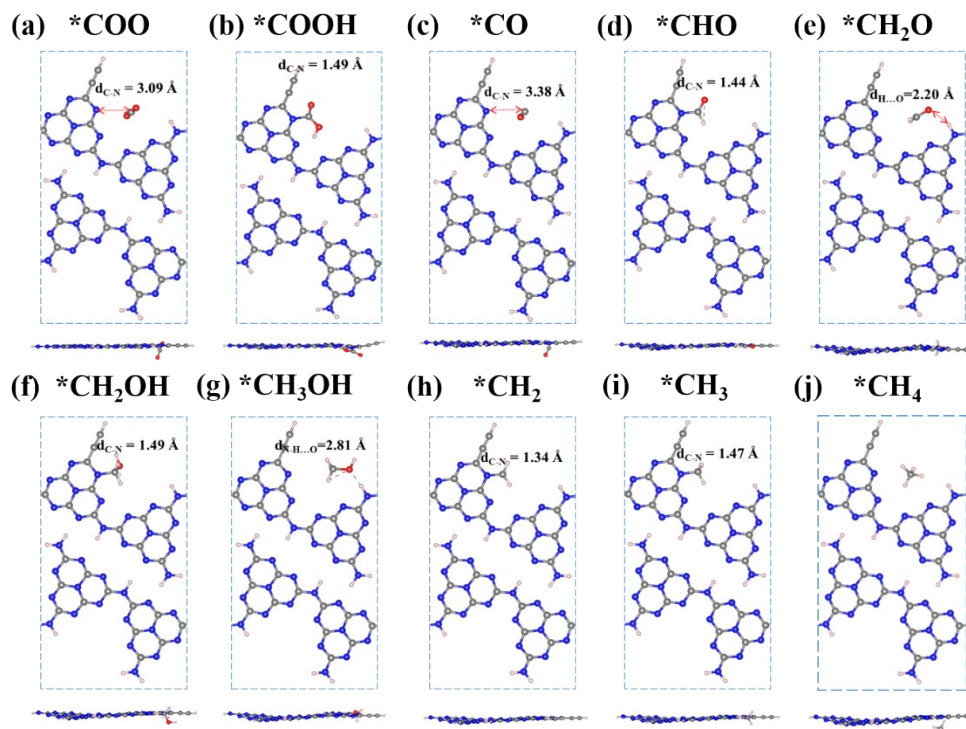

**Fig. S11** Top and side views of the structure of the CO<sub>2</sub> reduction reaction intermediate of edge-modified melon-based CN nanoribbons (CCH-MNR), where grey, blue, pink, and red represent C, N, H, and O atoms.

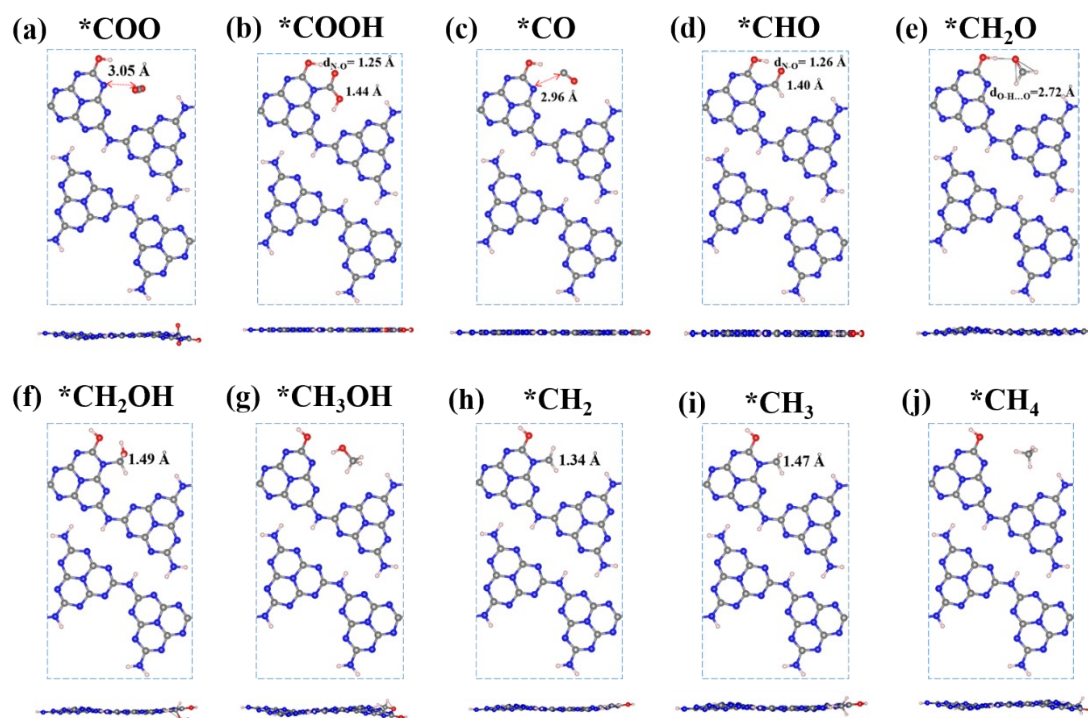

**Fig. S12** Top and side views of the structure of the CO<sub>2</sub> reduction reaction intermediate of edge-modified melon-based CN nanoribbons (OH-MNR), where grey, blue, pink, and red represent C, N, H, and O atoms.

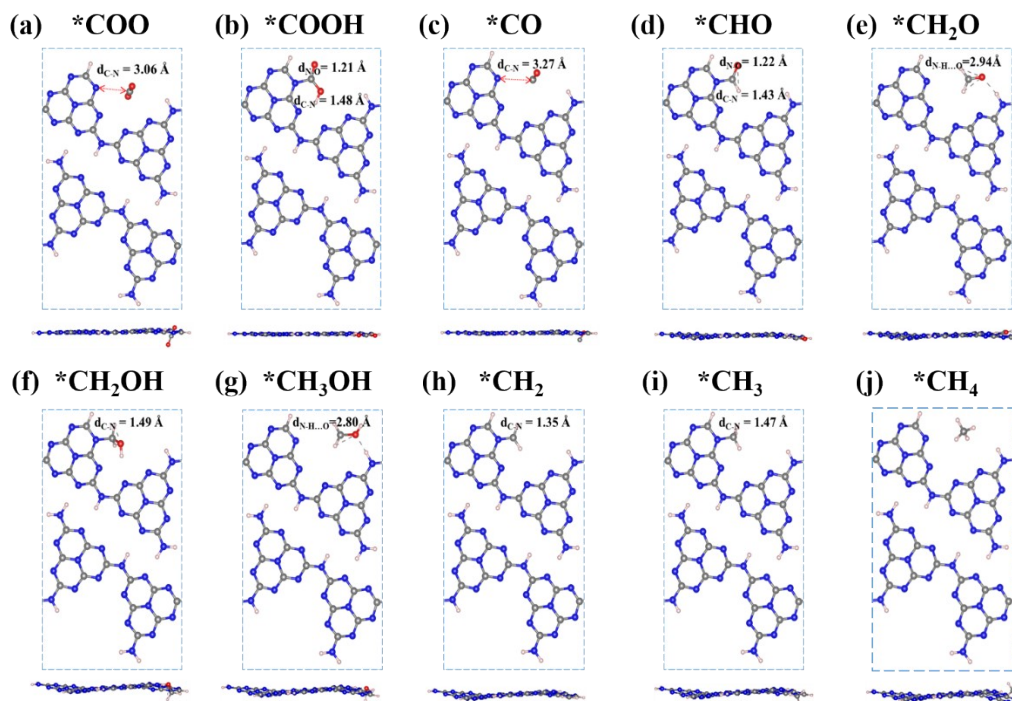

**Fig. S13** Top and side views of the structure of the CO<sub>2</sub> reduction reaction intermediate of edge-modified melon-based CN nanoribbons (H-MNR), where grey, blue, pink, and red represent C, N, H, and O atoms.

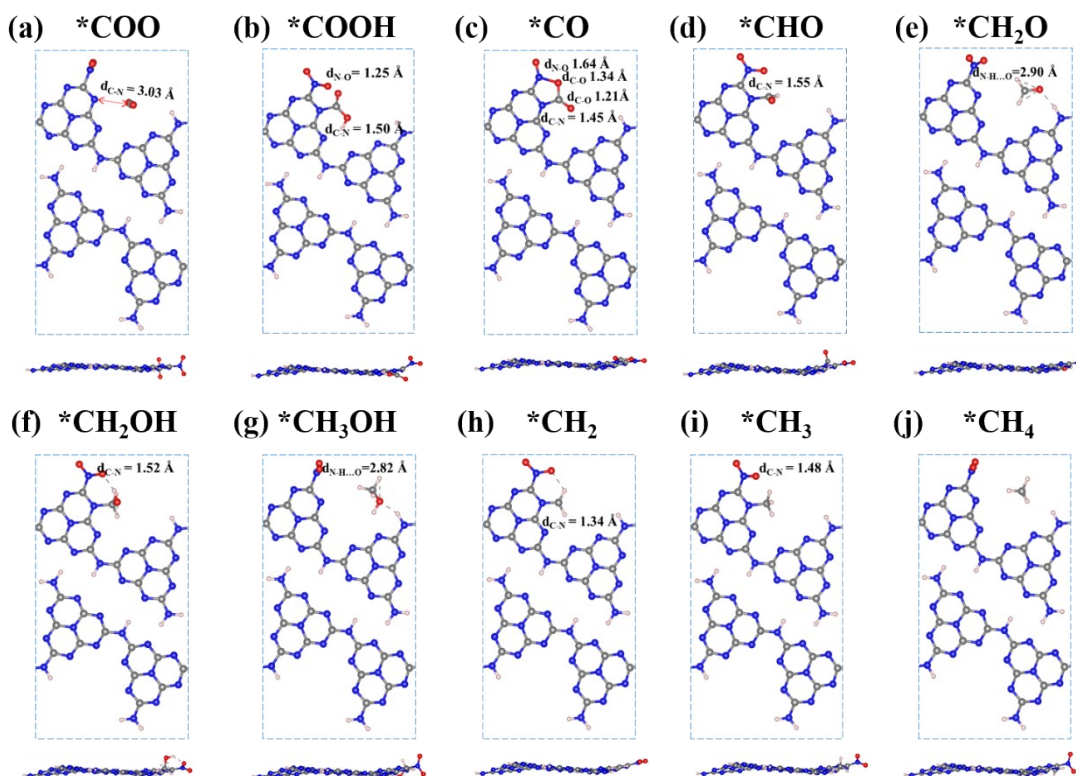

**Fig. S14** Top and side views of the structure of the CO<sub>2</sub> reduction reaction intermediate of edge-modified melon-based CN nanoribbons (NO<sub>2</sub>-MNR), where grey, blue, pink, and red represent C, N, H, and O atoms.

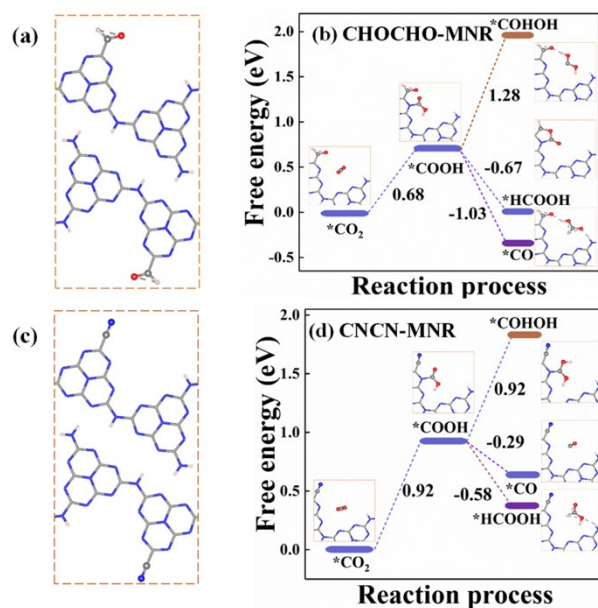

**Fig. S15** The structure and two-electron reaction process of  $\text{CO}_2$  reduction by CHOCHO-MNR (a and b) and by CNCN-MNR (c and d).

**Table S1** Bader charge of -NH, Heptazine ring and functional group of edge-modified melon-based CN nanoribbons (X-MNRs, X = -NO<sub>2</sub>, -CF<sub>3</sub>, -CN, -CHO, -F, -Cl, -OH, -C≡CH, -SH, -CH<sub>3</sub>, -H, -NH<sub>2</sub>)

|                  | Bader<br>(-NH) | Bader<br>(Heptazine ring) | Bader<br>(Functional group) |
|------------------|----------------|---------------------------|-----------------------------|
| -NO <sub>2</sub> | -0.77          | 1.05                      | -0.35                       |
| -CF <sub>3</sub> | -0.73          | 0.70                      | -0.05                       |
| -CN              | -0.76          | 0.79                      | -0.16                       |
| -CHO             | -0.68          | 0.56                      | 0.07                        |
| -F               | -0.65          | 1.23                      | -0.60                       |
| -Cl              | -0.71          | 0.80                      | -0.15                       |
| -OH              | -0.81          | 1.18                      | -0.45                       |
| -C≡CH            | -0.67          | 0.64                      | -0.01                       |
| -SH              | -0.71          | 0.50                      | 0.19                        |
| -CH <sub>3</sub> | -0.68          | 0.51                      | 0.15                        |
| -H               | -0.67          | 0.52                      | 0.12                        |
| -NH <sub>2</sub> | -0.68          | 1.05                      | -0.23                       |

**Table S2** Bader charge of C atoms (C1, C2, C3, C4, C5 and C6, labeled in Figure S1) of edge-modified melon-based CN nanoribbons (X-MNRs, X = -NO<sub>2</sub>, -CF<sub>3</sub>, -CN, -CHO, -F, -Cl, -OH, -C≡CH, -SH, -CH<sub>3</sub>, -H, -NH<sub>2</sub>)

|                  | Bader<br>(C1) | Bader<br>(C2) | Bader<br>(C3) | Bader<br>(C4) | Bader<br>(C5) | Bader<br>(C6) |
|------------------|---------------|---------------|---------------|---------------|---------------|---------------|
| -NO <sub>2</sub> | 1.57          | 1.57          | 1.54          | 1.61          | 1.48          | <b>1.42</b>   |
| -CF <sub>3</sub> | 1.50          | 1.47          | 1.62          | 1.59          | 1.57          | <b>1.17</b>   |
| -CN              | 1.60          | 1.54          | 1.55          | 1.56          | 1.47          | <b>1.12</b>   |
| -CHO             | 1.50          | 1.57          | 1.55          | 1.51          | 1.50          | <b>1.04</b>   |
| -F               | 1.50          | 1.55          | 1.57          | 1.53          | 1.52          | <b>1.78</b>   |
| -Cl              | 1.48          | 1.51          | 1.61          | 1.52          | 1.56          | <b>1.32</b>   |
| -OH              | 1.60          | 1.59          | 1.55          | 1.61          | 1.47          | <b>1.60</b>   |
| -C≡CH            | 1.59          | 1.54          | 1.56          | 1.51          | 1.50          | <b>1.13</b>   |
| -SH              | 1.54          | 1.54          | 1.60          | 1.57          | 1.55          | <b>1.07</b>   |
| -CH <sub>3</sub> | 1.52          | 1.52          | 1.59          | 1.53          | 1.48          | <b>1.15</b>   |
| -H               | 1.51          | 1.54          | 1.55          | 1.52          | 1.48          | <b>1.07</b>   |
| -NH <sub>2</sub> | 1.50          | 1.57          | 1.54          | 1.61          | 1.54          | <b>1.50</b>   |

**Table S3** Bader charge of N atoms (N1, N2, N3, N4, N5, N6 and N7, labeled in Figure S1) of edge-modified melon-based CN nanoribbons (X-MNRs, X = -NO<sub>2</sub>, -CF<sub>3</sub>, -CN, -CHO, -F, -Cl, -OH, -C≡CH, -SH, -CH<sub>3</sub>, -H, -NH<sub>2</sub>)

|                  | Bader<br>(N1) | Bader<br>(N2) | Bader<br>(N3) | Bader<br>(N4) | Bader<br>(N5) | Bader<br>(N6) | Bader<br>(N7) |
|------------------|---------------|---------------|---------------|---------------|---------------|---------------|---------------|
| -NO <sub>2</sub> | -1.15         | -1.15         | -1.19         | -1.14         | -1.16         | -1.16         | -1.17         |
| -CF <sub>3</sub> | -1.08         | -1.10         | -1.17         | -1.22         | -1.23         | -1.21         | -1.20         |
| -CN              | -1.12         | -1.14         | -1.19         | -1.18         | -1.16         | -1.08         | -1.18         |
| -CHO             | -1.12         | -1.18         | -1.21         | -1.23         | -1.15         | -1.12         | -1.12         |
| -F               | -1.13         | -1.15         | -1.21         | -1.22         | -1.17         | -1.20         | -1.14         |
| -Cl              | -1.10         | -1.12         | -1.20         | -1.23         | -1.16         | -1.20         | -1.21         |
| -OH              | -1.18         | -1.15         | -1.25         | -1.18         | -1.16         | -1.13         | -1.19         |
| -C≡CH            | -1.10         | -1.14         | -1.20         | -1.22         | -1.16         | -1.12         | -1.24         |
| -SH              | -1.19         | -1.11         | -1.22         | -1.22         | -1.23         | -1.19         | -1.21         |
| -CH <sub>3</sub> | -1.18         | -1.12         | -1.24         | -1.21         | -1.10         | -1.27         | -1.15         |
| -H               | -1.13         | -1.14         | -1.21         | -1.22         | -1.17         | -1.15         | -1.13         |
| -NH <sub>2</sub> | -1.12         | -1.17         | -1.20         | -1.19         | -1.16         | -1.21         | -1.16         |

**Table S4** Total energy of CO<sub>2</sub> adsorption inside and outside the hole of melon-based CN nanoribbons

|               | $E_{in}$ | $E_{out}$ |
|---------------|----------|-----------|
| $E_{ads}(eV)$ | -0.31    | -0.16     |

**Table S5** The CO<sub>2</sub> adsorption energy, Bader charge of COOH, functional group and pyridine N atom on heptazine ring, and rate-determining Gibbs free energy difference of edge-modified melon-based CN nanoribbons (X-MNRs)

|                  | $E_{\text{ads}}(\text{eV})$ | Bader<br>(COOH) | Bader<br>(functional group) | Bader<br>(Pyridine N) | $\Delta G$ (*COO<br>→ *COOH) |
|------------------|-----------------------------|-----------------|-----------------------------|-----------------------|------------------------------|
| -NO <sub>2</sub> | -0.232                      | 0.385           | -0.628                      | -1.15                 | 0.99                         |
| -CF <sub>3</sub> | -0.275                      | 0.354           | -0.037                      | -1.08                 | 1.17                         |
| -CN              | -0.295                      | 0.358           | -0.088                      | -1.12                 | 0.94                         |
| -CHO             | -0.302                      | 0.389           | -0.025                      | -1.11                 | 0.66                         |
| -F               | -0.270                      | 0.363           | -0.593                      | -1.12                 | 1.49                         |
| -Cl              | -0.257                      | 0.352           | -0.109                      | -1.10                 | 1.32                         |
| -OH              | -0.32                       | 0.329           | -0.453                      | -1.18                 | 1.17                         |
| -C≡CH            | -0.288                      | 0.394           | 0.017                       | -1.10                 | 0.89                         |
| -SH              | -0.275                      | 0.345           | 0.239                       | -1.18                 | 1.27                         |
| -CH <sub>3</sub> | -0.311                      | 0.338           | 0.193                       | -1.18                 | 1.11                         |
| -H               | -0.28                       | 0.325           | 0.215                       | -1.13                 | 0.83                         |
| -NH <sub>2</sub> | -0.31                       | 0.339           | -0.235                      | -1.12                 | 1.30                         |

**Table S6** Gibbs free energy of elementary reaction of melon-based CN and edge-modified melon-based CN nanoribbons (X-MNRs, X = -NH<sub>2</sub>, -NO<sub>2</sub>, -CN, -CHO, -C≡CH, -OH, -H)

|                      | $\Delta G(*\text{HCOOH} \rightarrow$<br>* + HCOOH) | $\Delta G(*\text{HCOOH} + \text{H}^+ \rightarrow$<br>*CHO + H <sub>2</sub> O) | $\Delta G$<br>(*CO → * + CO) |
|----------------------|----------------------------------------------------|-------------------------------------------------------------------------------|------------------------------|
| Melon                | 0.72                                               | 1.41                                                                          | -0.28                        |
| NH <sub>2</sub> -MNR | 0.98                                               | 1.55                                                                          | -0.22                        |
| NO <sub>2</sub> -MNR | 0.65                                               | 0.92                                                                          | 0.61                         |
| CN-MNR               | 0.81                                               | 1.04                                                                          | -0.28                        |
| CHO-MNR              | 0.88                                               | 1.12                                                                          | 0.77                         |
| CCH-MNR              | 0.92                                               | 1.18                                                                          | -0.30                        |
| OH-MNR               | 0.89                                               | 1.30                                                                          | -0.20                        |
| H-MNR                | 0.93                                               | 1.15                                                                          | -0.33                        |
